# Supplementary material for: PdCl2-promoted reactions of diaryl-substituted methylenecyclopropanes
Source: Royal Society of Chemistry journal article supplement (doi:10.1039/c0dt00059k), 2010-01-01
Supplement: c0dt00059k.pdf [file c0dt00059k.pdf]

## Supporting Information

### PdCl<sub>2</sub>-promoted reactions of diaryl-substituted methylenecyclopropanes

*Ming-Hui Qi,<sup>a</sup> Li-Xiong Shao,<sup>b\*</sup> and Min Shi<sup>a,c\*</sup>*

<sup>a</sup>Key Laboratory for Advanced Materials and Institute of Fine Chemicals, School of Chemistry & Molecular Engineering, East China University of Science and Technology, 130 Meilong Road, Shanghai 200237, P. R. China.

<sup>b</sup>College of Chemistry and Materials Engineering, Wenzhou University, Chashan University Town, Wenzhou 325035, Zhejiang Province, P. R. China.

<sup>c</sup>State Key Laboratory of Organometallic Chemistry, Shanghai Institute of Organic Chemistry, Chinese Academy of Sciences, 345 Lingling Road, Shanghai 200032 China.

#### CONTENTS

|   |                                                              |       |     |
|---|--------------------------------------------------------------|-------|-----|
| 1 | General Remarks                                              | ..... | S-2 |
| 2 | Optimization for the reaction of <b>1a</b><br>with Pd source | ..... | S-3 |
| 2 | Tables for the Suzuki-Miyaura<br>Coupling Reaction           | ..... | S-4 |
| 3 | General Reaction Procedure                                   | ..... | S-5 |
| 4 | Spectroscopic Data                                           | ..... | S-7 |

**General Remarks.**  $^1\text{H}$  NMR spectra and  $^{13}\text{C}$  NMR spectra were recorded on a Varian Mercury vx-300/400 MHz spectrometer for solution in  $\text{CDCl}_3$  with tetramethylsilane (TMS) as an internal standard. Infrared spectra were measured on a PERKIN-ELMER 983 spectrometer. Mass spectra were recorded with a HP-5989 instrument. Satisfactory CHN microanalyses were measured with a Carlo-Erba 1106 analyzer. Commercially obtained reagents were used without further purification. Organic solvents used were dried by standard methods when necessary. All reactions were monitored by TLC with Huanghai GF<sub>254</sub> silica gel coated plates. Flash column chromatography was carried out using 300-400 mesh silica gel at increased pressure.

**Table SI-1** Optimization for the reaction of MCP **1a** with Pd source

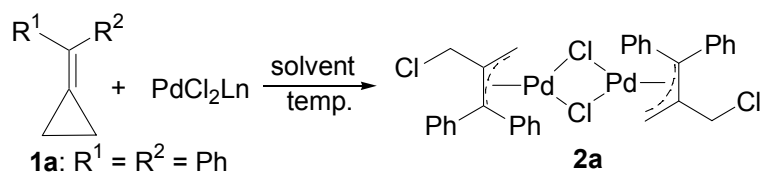

| Entry <sup>a</sup> | Ln                                | Solvent                         | Temp.  | Time/h | Yield/% <sup>b</sup> |
|--------------------|-----------------------------------|---------------------------------|--------|--------|----------------------|
| 1                  | none                              | toluene                         | rt     | 24     | 40                   |
| 2                  | none                              | DMSO                            | rt     | 35     | N.R.                 |
| 3                  | none                              | CH <sub>2</sub> Cl <sub>2</sub> | rt     | 40     | 41                   |
| 4                  | none                              | THF                             | rt     | 24     | 58                   |
| 5                  | none                              | CH <sub>3</sub> CN              | rt     | 48     | 30                   |
| 6                  | none                              | benzene                         | rt     | 40     | 47                   |
| 7                  | none                              | DCE                             | rt     | 40     | 39                   |
| 8                  | none                              | H <sub>2</sub> O                | rt     | 24     | N.R.                 |
| 9                  | none                              | THF                             | 50 °C  | 24     | 74                   |
| 10                 | none                              | THF                             | reflux | 24     | 74                   |
| 11                 | none                              | dioxane                         | 50 °C  | 24     | 70                   |
| 12                 | (CH <sub>3</sub> CN) <sub>2</sub> | THF                             | 50 °C  | 24     | 57                   |
| 13                 | (PhCN) <sub>2</sub>               | THF                             | 50 °C  | 24     | 52                   |
| 14                 | (PPh <sub>3</sub> ) <sub>2</sub>  | THF                             | 50 °C  | 24     | N.R.                 |
| 15                 | dppe                              | THF                             | 50 °C  | 24     | 28                   |

<sup>a</sup> All reactions were carried out using MCP **1a** (0.3 mmol), Pd source (0.33 mmol) and solvent (1.0 mL) at the listed temperature.

<sup>b</sup> Isolated yields.

The catalytic studies of complex **2a** in Suzuki-Miyaura coupling reaction were also carried out and the two tables below showed the results:

**Table SI-2 Suzuki-Miyaura Coupling Reaction Using 2a as Catalyst.**

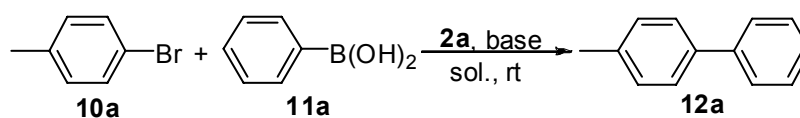

| entry <sup>a</sup> | base                                              | sol.               | yields/% <sup>b</sup> |
|--------------------|---------------------------------------------------|--------------------|-----------------------|
| 1                  | BuOK                                              | BuOH               | 17                    |
| 2                  | BuOK                                              | THF                | 19                    |
| 3                  | BuOK                                              | DCE                | N.R.                  |
| 4                  | BuOK                                              | CH <sub>3</sub> CN | N.R.                  |
| 5                  | BuOK                                              | PrOH               | 81                    |
| 6                  | KF                                                | PrOH               | 68                    |
| 7                  | Cs <sub>2</sub> CO <sub>3</sub>                   | PrOH               | 40                    |
| 8                  | KOH                                               | PrOH               | 61                    |
| 9                  | K <sub>2</sub> CO <sub>3</sub>                    | PrOH               | 43                    |
| 10                 | K <sub>3</sub> PO <sub>4</sub> ·3H <sub>2</sub> O | PrOH               | 63                    |

<sup>a</sup> Reaction conditions: **10a** (0.5 mmol), **11a** (0.6 mmol), **2a** [10 mg ([Pd]: 2.5 mol%)], base (1.2 mmol), sol. (2.0 mL), rt, 24 h.

<sup>b</sup> Isolated yields.

**Table SI-3 Suzuki-Miyaura Coupling Reactions of Arylbromides with Arylboronic Acids Using 2a as Catalyst.**

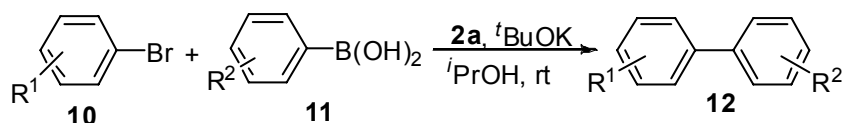

| entry <sup>a</sup> | <b>10</b> (R <sup>1</sup> )       | <b>11</b> (R <sup>2</sup> )       | yields/% <sup>b</sup> |
|--------------------|-----------------------------------|-----------------------------------|-----------------------|
| 1                  | <b>10b</b> (H)                    | <b>11b</b> (4-Me)                 | <b>12a</b> , 75       |
| 2                  | <b>10b</b>                        | <b>11c</b> (3,5-Me <sub>2</sub> ) | <b>12b</b> , 88       |
| 3                  | <b>10a</b> (4-Me)                 | <b>11c</b>                        | <b>12c</b> , 96       |
| 4                  | <b>10c</b> (2-Me)                 | <b>11a</b> (H)                    | <b>12d</b> , 61       |
| 5                  | <b>10d</b> (3,5-Me <sub>2</sub> ) | <b>11a</b>                        | <b>12b</b> , 60       |
| 6                  | <b>10c</b>                        | <b>11c</b>                        | <b>12e</b> , 68       |
| 7                  | <b>10e</b> (4-Cl)                 | <b>11c</b>                        | <b>12f</b> , 92       |

<sup>a</sup> Reaction conditions: **10** (0.5 mmol), **11** (0.6 mmol), **2a** [10 mg ([Pd]: 2.5 mol%)], <sup>t</sup>BuOK (1.2 mmol), <sup>i</sup>PrOH (2.0 mL), rt, 24 h.

<sup>b</sup> Isolated yields.

**General procedure for the reaction of MCPs 1 with PdCl<sub>2</sub> in THF.** Under an argon atmosphere, a mixture of MCPs **1** (0.30 mmol) and PdCl<sub>2</sub> (0.33 mmol) was stirred in anhydrous THF (1.0 mL) at 50 °C for 24 h. The solvent was removed under reduced pressure, and the residue was purified by flash chromatography on silica gel to give complex **2**.

**Procedure for the reaction of MCP 1a with PdBr<sub>2</sub> in THF.** Under an argon atmosphere, a mixture of MCP **1a** (0.30 mmol) and PdBr<sub>2</sub> (0.33 mmol) was stirred in anhydrous THF (1.0 mL) at 60 °C for 24 h. The solvent was removed under reduced pressure, and the residue was purified by flash chromatography on silica gel to give complex **3a**.

**General procedure for the reaction of MCPs 1 with PdCl<sub>2</sub> in DMAc.** Under an argon atmosphere, a mixture of MCPs **1** (0.30 mmol) and PdCl<sub>2</sub> (0.33 mmol) was stirred in anhydrous DMAc (1.0 mL) at 50 °C for 24 h. The reaction solution was diluted with EtOAc, washed with saturated brine, dried over anhydrous Na<sub>2</sub>SO<sub>4</sub>, and then purified by flash column chromatography on silica gel to give complexes **2** and **4**.

**Procedure for the reaction of MCP 1e with PdCl<sub>2</sub> in THF in the presence of NaBr.** A mixture of MCP **1e** (0.30 mmol), PdCl<sub>2</sub> (0.33 mmol) and NaBr (0.9 mmol) was stirred in anhydrous THF (1.0 mL) at 50 °C for 12 h. The solvent was removed under reduced pressure, and the residue was purified by flash chromatography on silica gel to give complex **3b**.

**Procedure for the reaction of MCP 1a with PdCl<sub>2</sub> in DMF in the presence of H<sub>2</sub>O.** Under an argon atmosphere, a mixture of MCP **1a** (0.30 mmol), PdCl<sub>2</sub> (0.33 mmol) and H<sub>2</sub>O (0.6 mmol to 3 mmol) was stirred in anhydrous DMF (1.0 mL) at room temperature for 24 h. The reaction solution was diluted with EtOAc, washed with saturated brine, dried over anhydrous Na<sub>2</sub>SO<sub>4</sub>, and then purified by flash column chromatography on silica gel to give complexes **2** and/or **5** and/or **6**.

**Procedure for the formation of complex 7.** Under an argon atmosphere, a mixture of complex **2a** (0.05 mmol), IPr·HCl (0.11 mmol) and <sup>t</sup>BuOK (0.25 mmol) was stirred in anhydrous THF (1.0 mL) at room temperature for 12 h. The solvent was removed under reduced pressure, and the residue was purified by flash column chromatography on silica gel to give complex **7**.

**General procedure for Suzuki-Miyaura coupling reaction.** Under an argon atmosphere, boronic acid **11** (0.6 mmol), <sup>t</sup>BuOK (1.2 mmol), complex **2a** (10 mg, 2.5 mol%), <sup>i</sup>PrOH (2.0

mL) and bromide **10** (0.5 mmol) was successively added into a Schlenk reaction tube. The mixture was stirred at room temperature for 24 h. Then the solvent was removed under reduced pressure and the residue was purified by flash column chromatography on silica gel to give products **12**.

Product **2a**. A yellow solid. Mp: 220 °C (decomposed).  $^1\text{H}$  NMR ( $\text{CDCl}_3$ , 300 MHz, TMS)  $\delta$  3.51 (s, 2H), 4.04 (d, 2H,  $J = 11.1$  Hz), 4.16 (d, 2H,  $J = 4.5$  Hz), 4.29 (d, 2H,  $J = 11.1$  Hz), 7.23-7.39 (m, 16H, Ar), 7.48 (d, 4H,  $J = 7.2$  Hz, Ar).  $^{13}\text{C}$  NMR ( $\text{CDCl}_3$ , 75 MHz)  $\delta$  43.0, 64.1, 99.2, 115.7, 127.7, 127.9, 128.5, 128.7, 130.0, 130.7, 140.0, 140.1. IR ( $\text{CH}_2\text{Cl}_2$ ):  $\nu$  3056, 2925, 1490, 1443, 1260, 1077, 760  $\text{cm}^{-1}$ . MS (MALDI)  $m/z$ : 654 ( $\text{M}^+ - ^{102}\text{Pd}$ ). Anal. Calcd. For  $\text{C}_{32}\text{H}_{28}\text{Cl}_4\text{Pd}_2$  requires: C, 50.10 %; H, 3.68%; Found: C, 49.97 %; H, 3.84%.

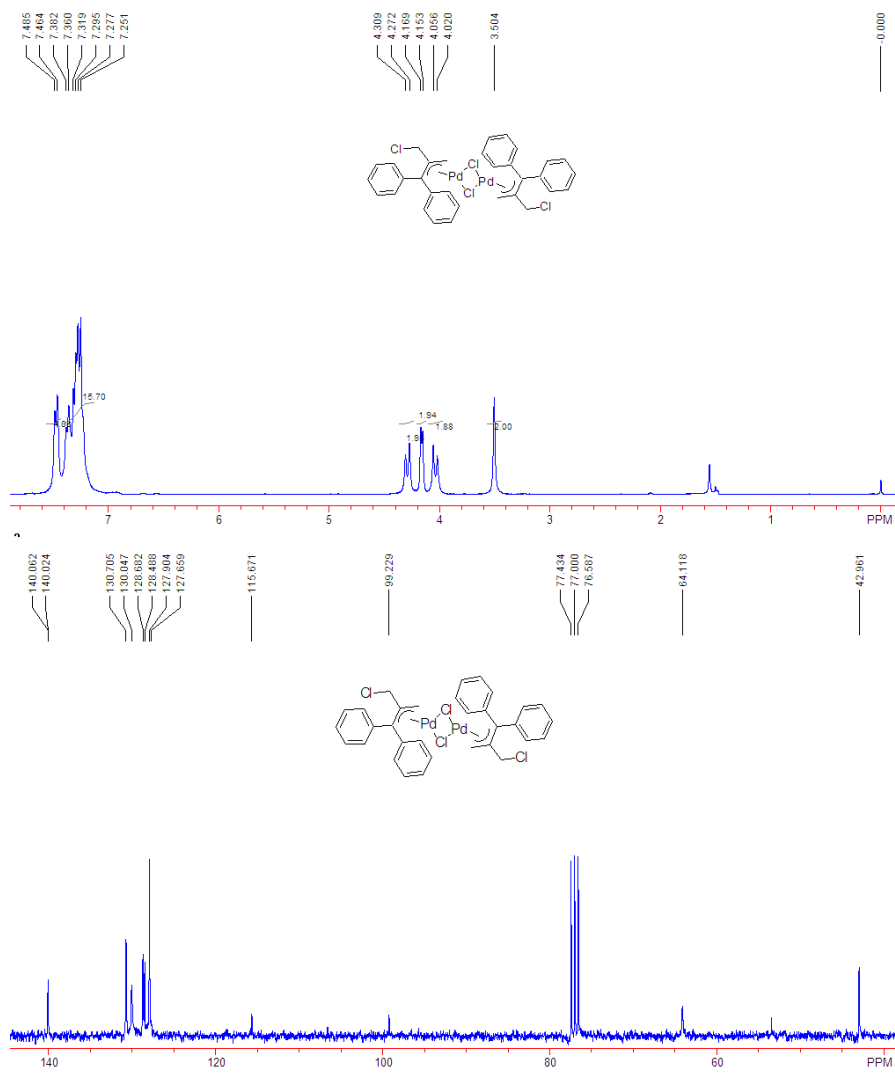

Product **2b**. A yellow solid. Mp: 196 °C (decomposed).  $^1\text{H}$  NMR ( $\text{CDCl}_3$ , 300 MHz, TMS)  $\delta$  2.26 (s, 6H), 2.30 (s, 6H), 3.47 (s, 2H), 4.03 (d, 2H,  $J = 10.8$  Hz), 4.10 (d, 2H,  $J = 6.6$  Hz), 4.33 (d, 2H,  $J = 10.8$  Hz), 7.04 (d, 8H,  $J = 7.5$  Hz, Ar), 7.24 (d, 4H,  $J = 7.8$  Hz, Ar), 7.34 (d, 4H,  $J = 8.1$  Hz, Ar).  $^{13}\text{C}$  NMR ( $\text{CDCl}_3$ , 75 MHz)  $\delta$  21.26, 21.31, 43.1, 63.6, 99.5, 115.1, 128.5, 129.26, 129.34, 129.9, 130.7, 137.2, 137.3, 138.4. IR ( $\text{CH}_2\text{Cl}_2$ ):  $\nu$  3015, 2922, 2844, 1609,

1508, 1442, 1260, 1185, 1021, 818  $\text{cm}^{-1}$ . MS (MALDI)  $m/z$ : 710 ( $\text{M}^+ - ^{102}\text{Pd}$ ). Anal. Calcd. For  $\text{C}_{36}\text{H}_{36}\text{Cl}_4\text{Pd}_2$  requires: C, 52.52 %; H, 4.41%; Found: C, 52.82 %; H, 4.51%.

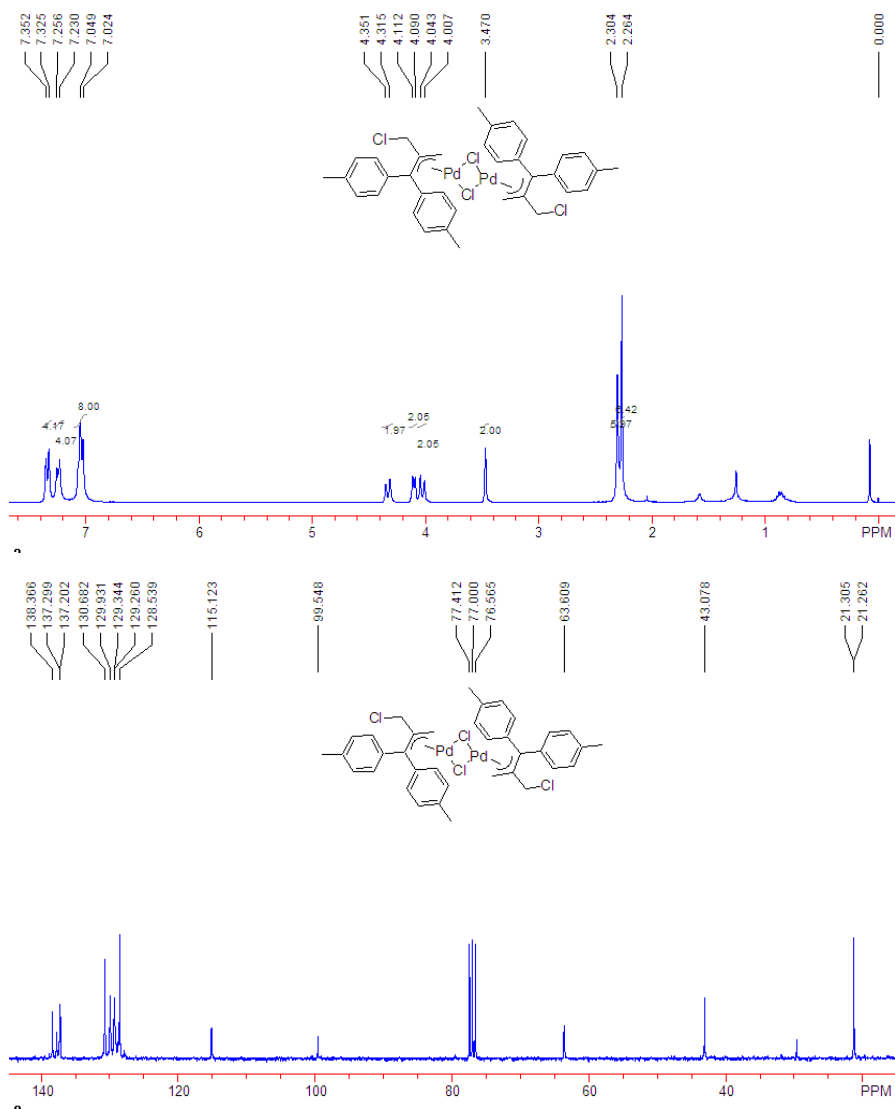

Product **2c**. A yellow solid. Mp: 202 °C (decomposed).  $^1\text{H}$  NMR ( $\text{CDCl}_3$ , 300 MHz, TMS)  $\delta$  3.48 (s, 2H), 4.03 (d, 2H,  $J = 11.4$  Hz), 4.17 (d, 2H,  $J = 9.0$  Hz), 4.25 (d, 2H,  $J = 11.4$  Hz), 6.94-7.00 (m, 8H, Ar), 7.30-7.35 (m, 4H, Ar), 7.41-7.46 (m, 4H, Ar).  $^{13}\text{C}$  NMR ( $\text{CDCl}_3$ , 75 MHz)  $\delta$  42.7, 64.2, 96.8, 115.1 (d,  $J_{\text{C-F}} = 21.9$  Hz), 115.9 (d,  $J_{\text{C-F}} = 18.0$  Hz), 116.0, 131.6, 132.5 (d,  $J_{\text{C-F}} = 7.9$  Hz), 135.68, 135.71 (d,  $J_{\text{C-F}} = 8.2$  Hz), 162.1 (d,  $J_{\text{C-F}} = 248.0$  Hz), 162.4 (d,  $J_{\text{C-F}} = 249.1$  Hz). IR ( $\text{CH}_2\text{Cl}_2$ ):  $\nu$  2950, 2926, 1601, 1505, 1235, 1160, 1099, 1015, 837  $\text{cm}^{-1}$ . MS (MALDI)  $m/z$ : 726 ( $\text{M}^+ - ^{102}\text{Pd}$ ). HRMS (MALDI) Calcd. For  $\text{C}_{32}\text{H}_{24}\text{F}_4\text{Cl}_4^{102}\text{Pd}^{+1}$  requires: 725.9619; Found: 725.9599.



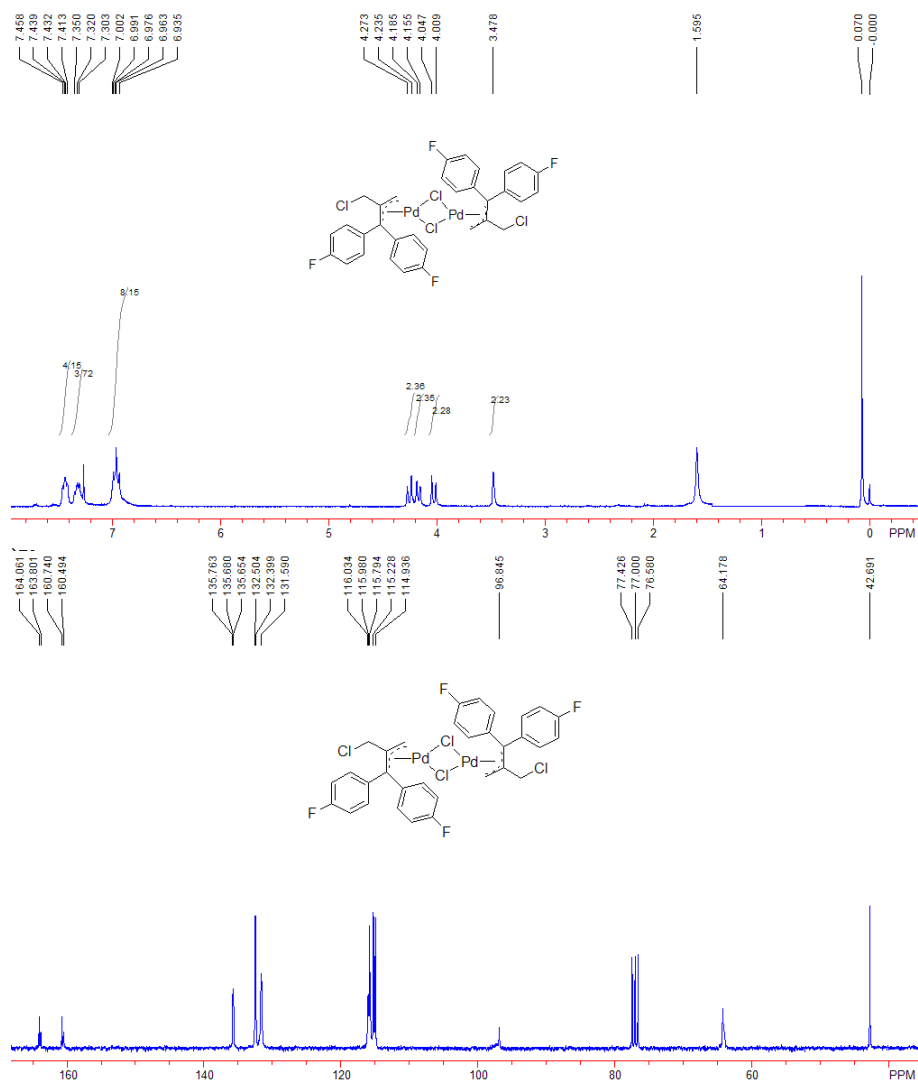

Product **2d**. A yellow solid. Mp: 156-158 °C.  $^1\text{H}$  NMR ( $\text{CDCl}_3$ , 300 MHz, TMS)  $\delta$  3.46 (s, 2H), 3.78 (s, 6H, OMe), 3.82 (s, 6H, OMe), 4.05 (d, 2H,  $J = 12.3$  Hz), 4.11 (d, 2H,  $J = 11.7$  Hz), 4.36 (d, 2H,  $J = 10.8$  Hz), 6.76 (d, 4H,  $J = 8.1$  Hz, Ar), 6.79 (d, 4H,  $J = 8.1$  Hz, Ar), 7.29 (d, 4H,  $J = 8.1$  Hz, Ar), 7.38 (d, 4H,  $J = 8.1$  Hz, Ar).  $^{13}\text{C}$  NMR ( $\text{CDCl}_3$ , 75 MHz)  $\delta$  43.2, 55.2, 60.4, 63.2, 99.3, 113.2, 113.9, 114.0, 114.6, 131.3, 131.4, 132.2, 132.4, 132.6, 159.2, 159.5. IR ( $\text{CH}_2\text{Cl}_2$ ):  $\nu$  3002, 2950, 2929, 2387, 1604, 1508, 1295, 1252, 1176, 1034, 833  $\text{cm}^{-1}$ . MS (MALDI)  $m/z$ : 774 ( $\text{M}^+ - 102\text{Pd}$ ). HRMS (MALDI) Calcd. For  $\text{C}_{36}\text{H}_{36}\text{O}_4\text{Cl}_4^{102}\text{Pd}^+$  requires: 774.0418; Found: 774.0425.

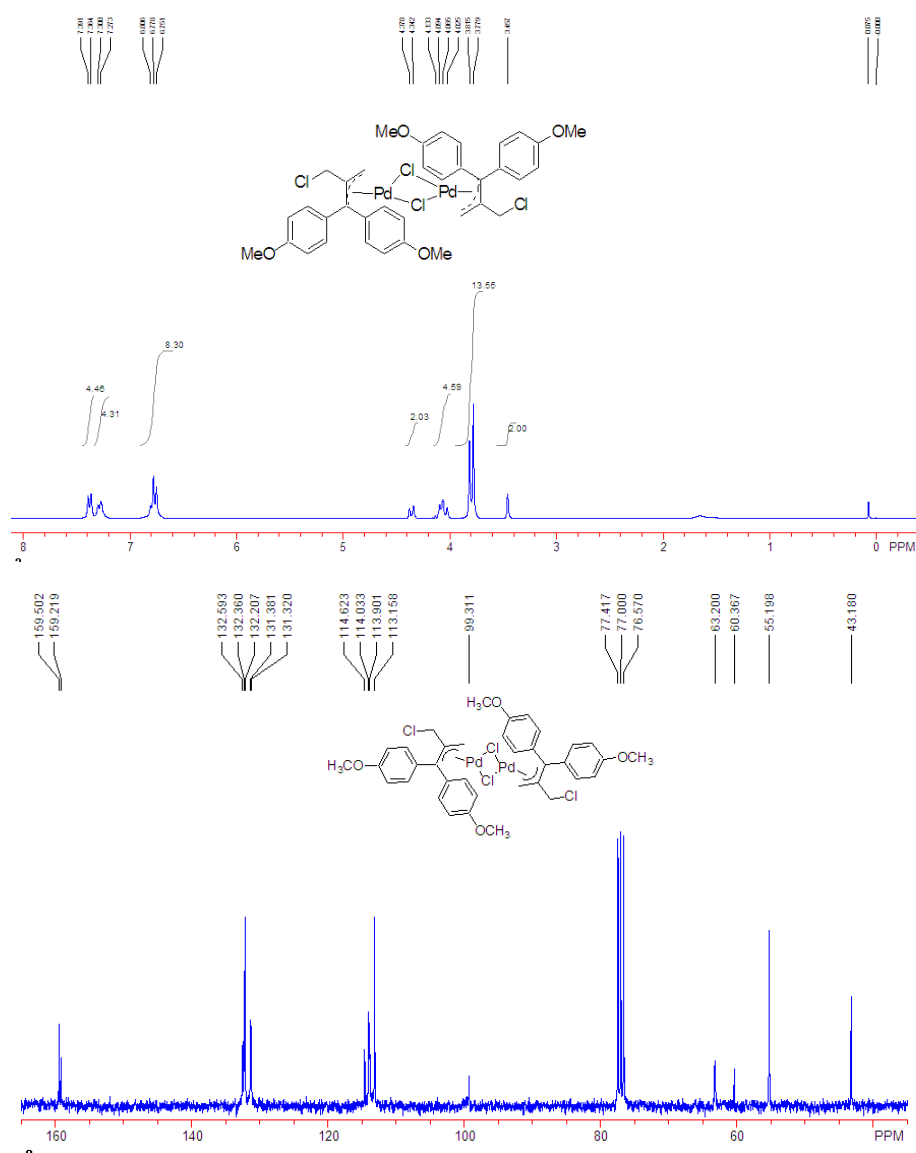

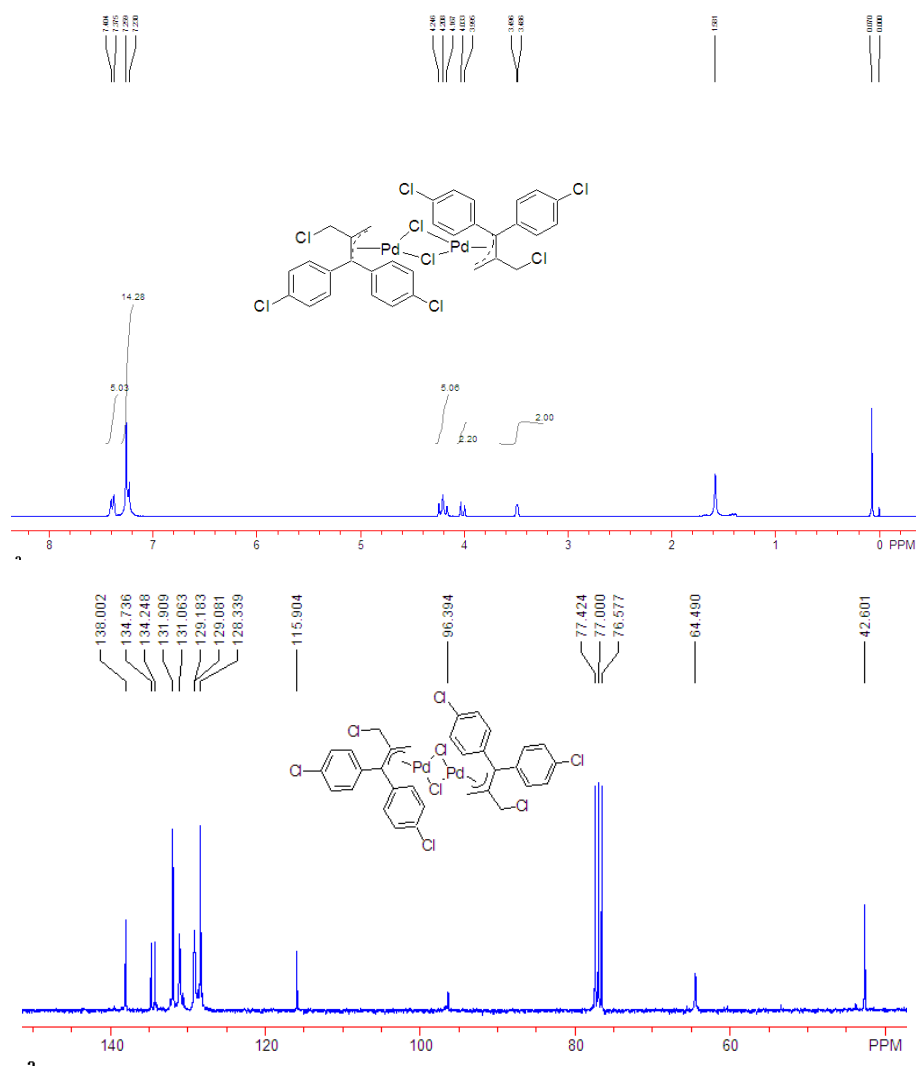

Product **2f**. A yellow solid. Mp: 197 °C (decomposed). (*Z, Z*- or *Z, E*-isomer) <sup>1</sup>H NMR (CDCl<sub>3</sub>, 300 MHz, TMS) δ 3.50 (s, 2H), 4.03 (d, 2H, *J* = 11.1 Hz), 4.17 (d, 2H, *J* = 4.5 Hz), 4.26 (d, 2H, *J* = 11.1 Hz), 7.22-7.34 (m, 14H, Ar), 7.40-7.46 (m, 4H, Ar). (*Z, E*- or *Z, Z*-isomer) <sup>1</sup>H NMR (CDCl<sub>3</sub>, 300 MHz, TMS) δ 3.50 (s, 2H), 4.03 (d, 2H, *J* = 11.1 Hz), 4.17 (d, 2H, *J* = 4.5 Hz), 4.26 (d, 2H, *J* = 11.1 Hz), 7.22-7.34 (m, 14H, Ar), 7.40-7.46 (m, 4H, Ar). (*Z, Z*- or *Z, E*-isomer) <sup>13</sup>C NMR (CDCl<sub>3</sub>, 75 MHz) δ 42.7, 64.2, 97.8, 115.7, 128.0, 128.7, 129.9, 131.1, 133.9, 134.4, 138.4, 139.5. (*Z, E*- or *Z, Z*-isomer) <sup>13</sup>C NMR (CDCl<sub>3</sub>, 75 MHz) δ 42.8, 64.4, 97.8, 115.8, 128.2, 128.8, 130.6, 131.9, 133.9, 134.4, 138.5, 139.6. IR (CH<sub>2</sub>Cl<sub>2</sub>): ν 3058, 3006, 2950, 2926, 2854, 1908, 1782, 1589, 1487, 1445, 1260, 1216, 1092, 1014, 828 cm<sup>-1</sup>. MS (MALDI) *m/z*: 722 (M<sup>+</sup>-<sup>102</sup>Pd). HRMS (MALDI) Calcd. For C<sub>32</sub>H<sub>26</sub>Cl<sub>6</sub><sup>102</sup>Pd<sup>+</sup> requires: 721.9216; Found: 721.9219.

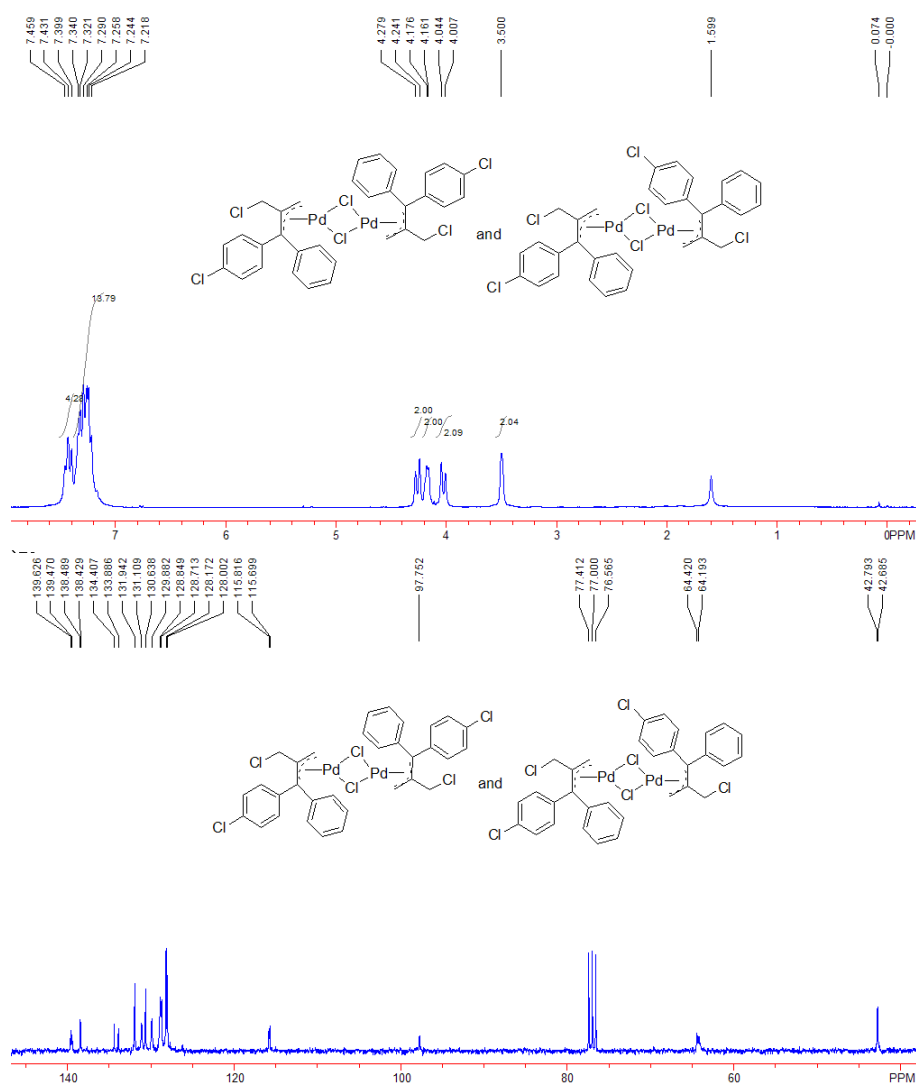

Product **3a**. A yellow solid. Mp: 186 °C (decomposed). <sup>1</sup>H NMR (CDCl<sub>3</sub>, 300 MHz, TMS) δ 3.45 (s, 2H), 3.92 (d, 2H, *J* = 8.4 Hz), 4.16 (d, 2H, *J* = 5.4 Hz), 4.22 (d, 2H, *J* = 9.3 Hz), 7.22-7.41 (m, 16H, Ar), 7.48 (d, 4H, *J* = 6.9 Hz, Ar). <sup>13</sup>C NMR (CDCl<sub>3</sub>, 75 MHz) δ 30.3, 64.5, 64.6, 101.7, 115.4, 127.8, 127.9, 128.6, 128.7, 130.5, 131.3, 139.9, 140.1. IR (CH<sub>2</sub>Cl<sub>2</sub>): ν 3054, 2954, 2925, 2853, 1737, 1489, 1443, 1338, 1213, 761 cm<sup>-1</sup>. MS (MALDI) *m/z*: 834 (M<sup>+</sup>-<sup>106</sup>Pd).

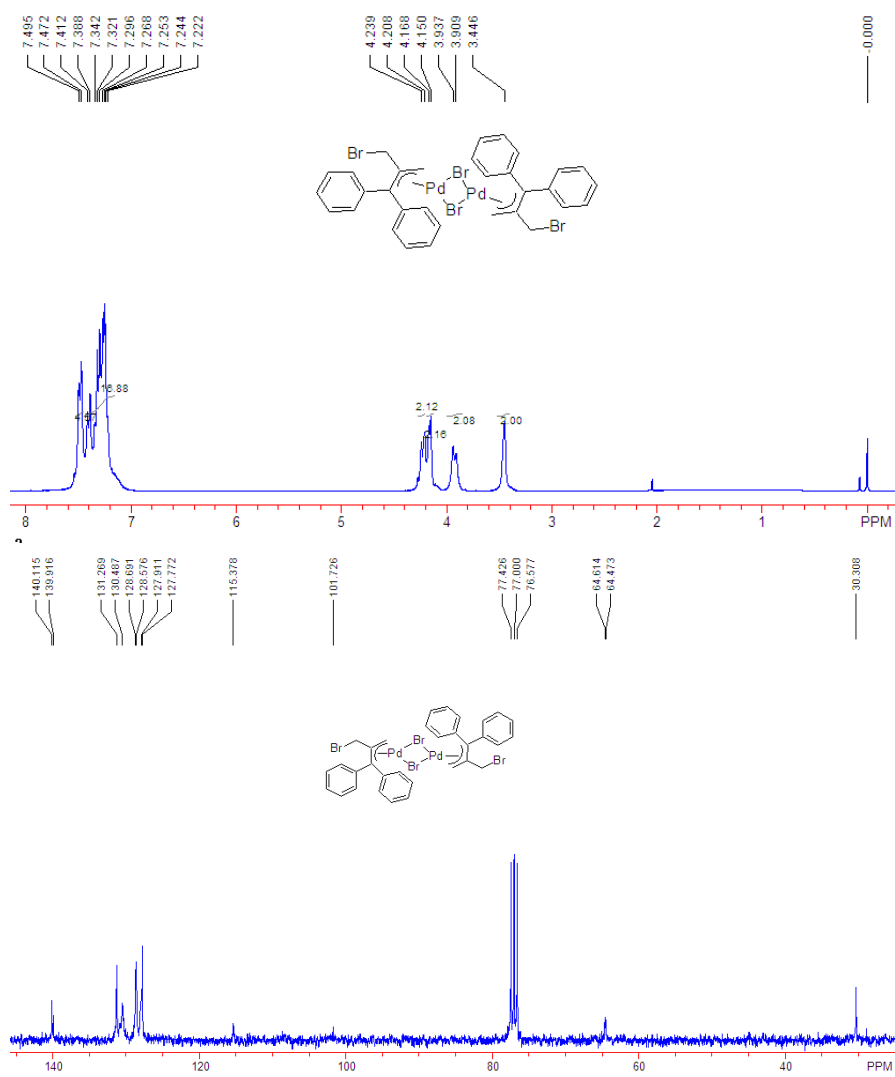

Product **3b**. A yellow solid. Mp: 194 °C (decomposed).  $^1\text{H}$  NMR ( $\text{CDCl}_3$ , 400 MHz, TMS)  $\delta$  3.43 (d, 2H,  $J = 18.0$  Hz), 3.90 (d, 2H,  $J = 10.0$  Hz), 4.12-4.22 (m, 4H), 7.13-7.30 (m, 12H, Ar), 7.39 (d, 4H,  $J = 7.6$  Hz, Ar).  $^{13}\text{C}$  NMR ( $\text{CDCl}_3$ , 100 MHz)  $\delta$  29.7, 64.7, 64.9, 98.9, 115.8, 128.2, 129.2, 131.6, 132.5, 134.3, 134.9, 138.0, 138.2. IR ( $\text{CH}_2\text{Cl}_2$ ):  $\nu$  3048, 1908, 1588, 1488, 1398, 1275, 1262, 1213, 1093, 1013, 828  $\text{cm}^{-1}$ . MS (ESI)  $m/z$ : 1076 ( $\text{M}^+\text{H}$ ). HRMS (ESI) Calcd. For  $\text{C}_{32}\text{H}_{25}\text{Br}_4\text{Cl}_4\text{Pd}_2$  requires: 1076.5514; Found: 1076.4431.

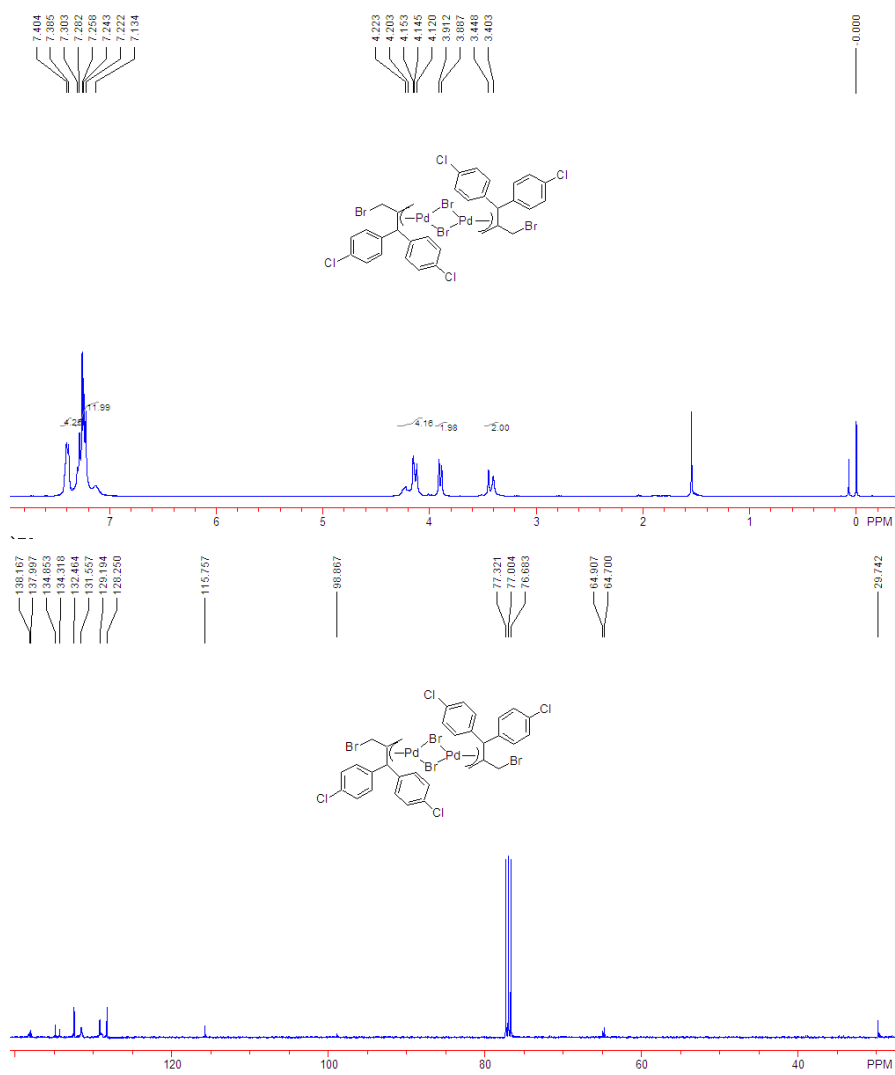

Product **4a**. A yellow solid. Mp: 213 °C (decomposed). <sup>1</sup>H NMR (CDCl<sub>3</sub>, 300 MHz, TMS) δ 2.04 (s, 3H), 2.06 (s, 3H), 3.50 (s, 2H), 4.20 (d, 2H, *J* = 7.5 Hz), 4.72 (s, 4H), 7.21-7.36 (m, 16H, Ar), 7.46 (d, 4H, *J* = 7.2 Hz, Ar). <sup>13</sup>C NMR (CDCl<sub>3</sub>, 75 MHz) δ 20.7, 29.6, 63.1, 98.9, 116.3, 127.7, 127.8, 128.3, 128.6, 130.1, 130.6, 140.2, 140.5, 170.1. IR (CH<sub>2</sub>Cl<sub>2</sub>): ν 3056, 3022, 2926, 1745, 1677, 1597, 1490, 1444, 1371, 1222, 1033, 760 cm<sup>-1</sup>. MS (ESI) *m/z*: 833 (M+Na)<sup>+</sup>. HRMS (ESI) Calcd. For C<sub>36</sub>H<sub>36</sub>N<sub>2</sub>O<sub>2</sub>NaCl<sub>2</sub>Pd<sub>2</sub> (M+Na)<sup>+</sup> requires: 833.0121; Found: 833.0180.

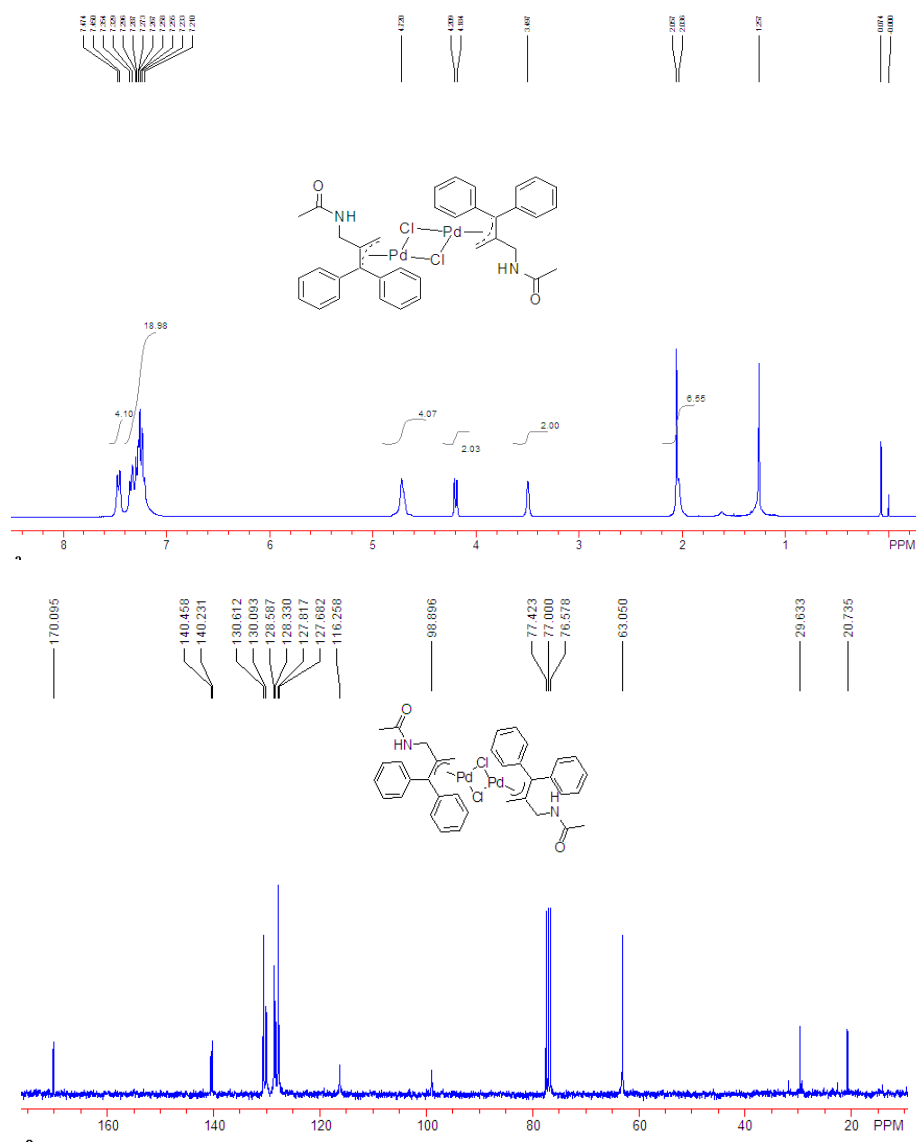

Product **4b**. A yellow solid. Mp: 84-86 °C.  $^1\text{H}$  NMR ( $\text{CDCl}_3$ , 300 MHz, TMS)  $\delta$  2.04 (s, 3H), 2.06 (s, 3H), 2.26 (s, 6H), 2.30 (s, 6H), 3.46 (s, 2H), 4.14 (d, 2H,  $J = 9.3$  Hz), 4.71 (s, 4H), 7.02 (d, 4H,  $J = 6.9$  Hz, Ar), 7.05 (d, 4H,  $J = 7.8$  Hz, Ar), 7.21 (d, 4H,  $J = 6.9$  Hz, Ar), 7.32 (d, 4H,  $J = 7.8$  Hz, Ar). IR ( $\text{CH}_2\text{Cl}_2$ ):  $\nu$  2949, 2925, 2855, 1745, 1459, 1376, 1222, 1028, 818, 772  $\text{cm}^{-1}$ . MS (ESI)  $m/z$ : 889 ( $\text{M}^+ + \text{Na}$ ). HRMS (ESI) Calcd. For  $\text{C}_{40}\text{H}_{44}\text{N}_2\text{O}_2\text{NaCl}_2\text{Pd}_2$  ( $\text{M}^+ + \text{Na}$ ) requires: 889.0747; Found: 889.0803.

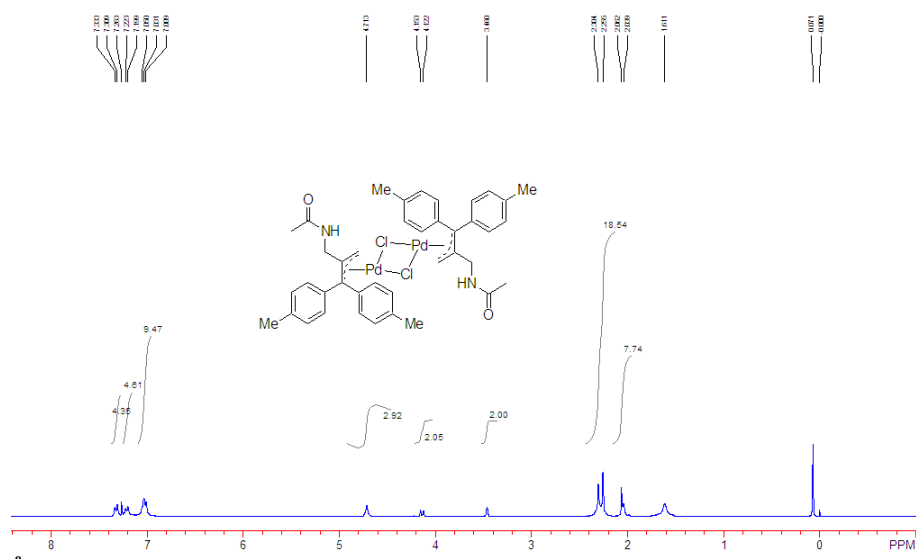

Product **4c**. A yellow solid. Mp: 135-138 °C.  $^1\text{H}$  NMR ( $\text{CDCl}_3$ , 300 MHz, TMS)  $\delta$  2.06 (s, 3H), 2.07 (s, 3H), 3.45 (s, 2H), 4.21 (d, 2H,  $J = 11.7$  Hz), 4.68 (s, 4H), 6.92-6.97 (m, 8H, Ar), 7.27-7.44 (m, 8H, Ar). IR ( $\text{CH}_2\text{Cl}_2$ ):  $\nu$  2919, 1738, 1494, 1364, 1217, 1094, 829  $\text{cm}^{-1}$ . MS (ESI)  $m/z$ : 905 ( $\text{M}^+ + \text{Na}$ ). HRMS (ESI) Calcd. For  $\text{C}_{36}\text{H}_{32}\text{N}_2\text{O}_2\text{NaF}_4\text{Cl}_2\text{Pd}_2$  ( $\text{M}^+ + \text{Na}$ ) requires: 904.9744; Found: 904.9763.

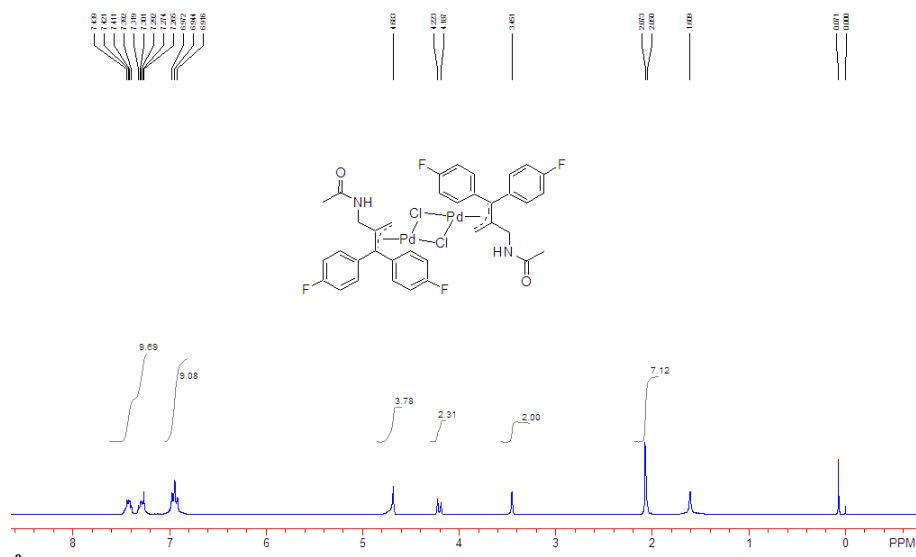

Product **4d**. A yellow solid. Mp: 85-87 °C.  $^1\text{H}$  NMR ( $\text{CDCl}_3$ , 300 MHz, TMS)  $\delta$  2.05 (s, 3H), 2.07 (s, 3H), 3.47 (s, 2H), 4.22 (d, 2H,  $J = 11.4$  Hz), 4.62-4.74 (m, 4H), 7.17-7.26 (m, 12H, Ar), 7.37 (d, 2H,  $J = 8.4$  Hz, Ar), 7.40 (d, 2H,  $J = 6.6$  Hz, Ar). IR ( $\text{CH}_2\text{Cl}_2$ ):  $\nu$  2950, 2926, 1744, 1589, 1490, 1376, 1221, 1092, 1015, 828  $\text{cm}^{-1}$ . MS (ESI)  $m/z$ : 969 ( $\text{M}^+ + \text{Na}$ ). HRMS



(ESI) Calcd. For  $C_{36}H_{32}N_2O_2NaCl_6Pd_2$  ( $M^+ + Na$ ) requires: 968.8562; Found: 968.8572.

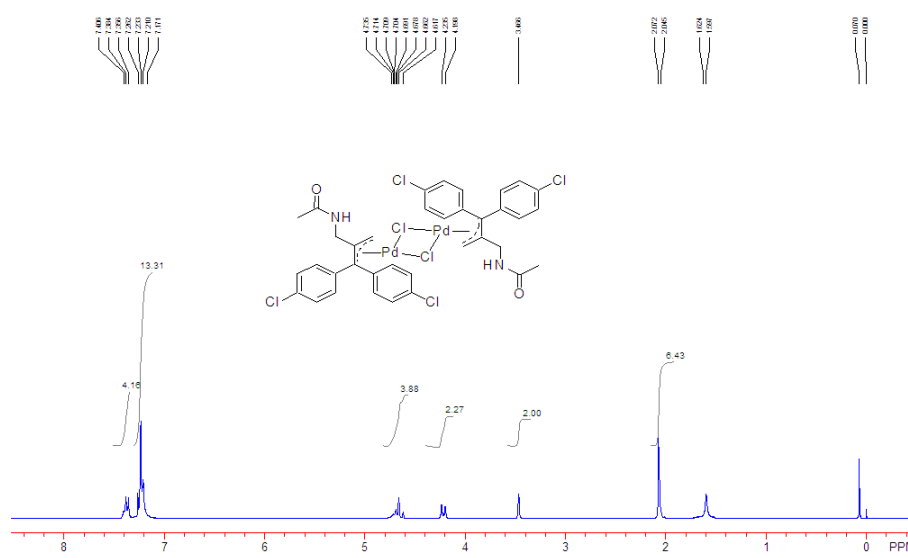

Product **4e**. A yellow solid. Mp: 83-85 °C. (*Z, Z*- or *Z, E*-isomer) <sup>1</sup>H NMR (CDCl<sub>3</sub>, 300 MHz, TMS) δ 2.06 (s, 3H), 2.08 (s, 3H), 3.48 (s, 2H), 4.21 (d, 2H, *J* = 9.0 Hz), 4.69 (s, 4H), 7.20-7.44 (m, 18H, Ar). (*Z, E*- or *Z, Z*-isomer) <sup>1</sup>H NMR (CDCl<sub>3</sub>, 300 MHz, TMS) δ 2.06 (s, 3H), 2.08 (s, 3H), 3.48 (s, 2H), 4.21 (d, 2H, *J* = 9.0 Hz), 4.69 (s, 4H), 7.20-7.44 (m, 18H, Ar).. IR (CH<sub>2</sub>Cl<sub>2</sub>): ν 2950, 2926, 2841, 1745, 1488, 1371, 1221, 1092, 829, 760 cm<sup>-1</sup>. MS (ESI) *m/z*: 901 ( $M^+ + Na$ ). HRMS (ESI) Calcd. For  $C_{36}H_{34}N_2O_2NaCl_4Pd_2$  ( $M^+ + Na$ ) requires: 900.9342; Found: 900.9438.

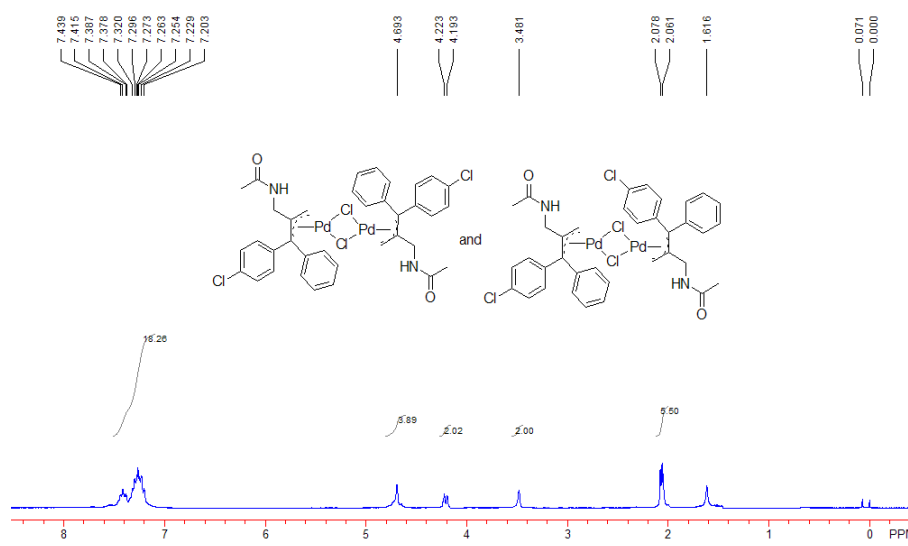

Product **5**. A yellow solid. Mp: 169-171 °C. <sup>1</sup>H NMR (CDCl<sub>3</sub>, 300 MHz, TMS) δ 3.53 (s, 2H), 4.22 (d, 2H, *J* = 6.3 Hz), 4.81 (s, 4H), 7.23-7.35 (m, 16H, Ar), 7.47 (d, 4H, *J* = 7.5 Hz, Ar),

8.01 (s, 1H), 8.03 (s, 1H).  $^{13}\text{C}$  NMR ( $\text{CDCl}_3$ , 75 MHz)  $\delta$  22.7, 63.4, 99.5, 115.1, 127.9, 128.0, 128.5, 128.7, 130.1, 130.6, 140.1, 140.3, 159.9. IR ( $\text{CH}_2\text{Cl}_2$ ):  $\nu$  3052, 2926, 2854, 1727, 1491, 1443, 1147, 925, 759  $\text{cm}^{-1}$ . MS (ESI)  $m/z$ : 805 ( $\text{M}^+\text{Na}$ ). HRMS (ESI) Calcd. For  $\text{C}_{34}\text{H}_{32}\text{N}_2\text{O}_2\text{NaCl}_2\text{Pd}_2$  ( $\text{M}^+\text{Na}$ ) requires: 804.9808; Found: 804.9826.

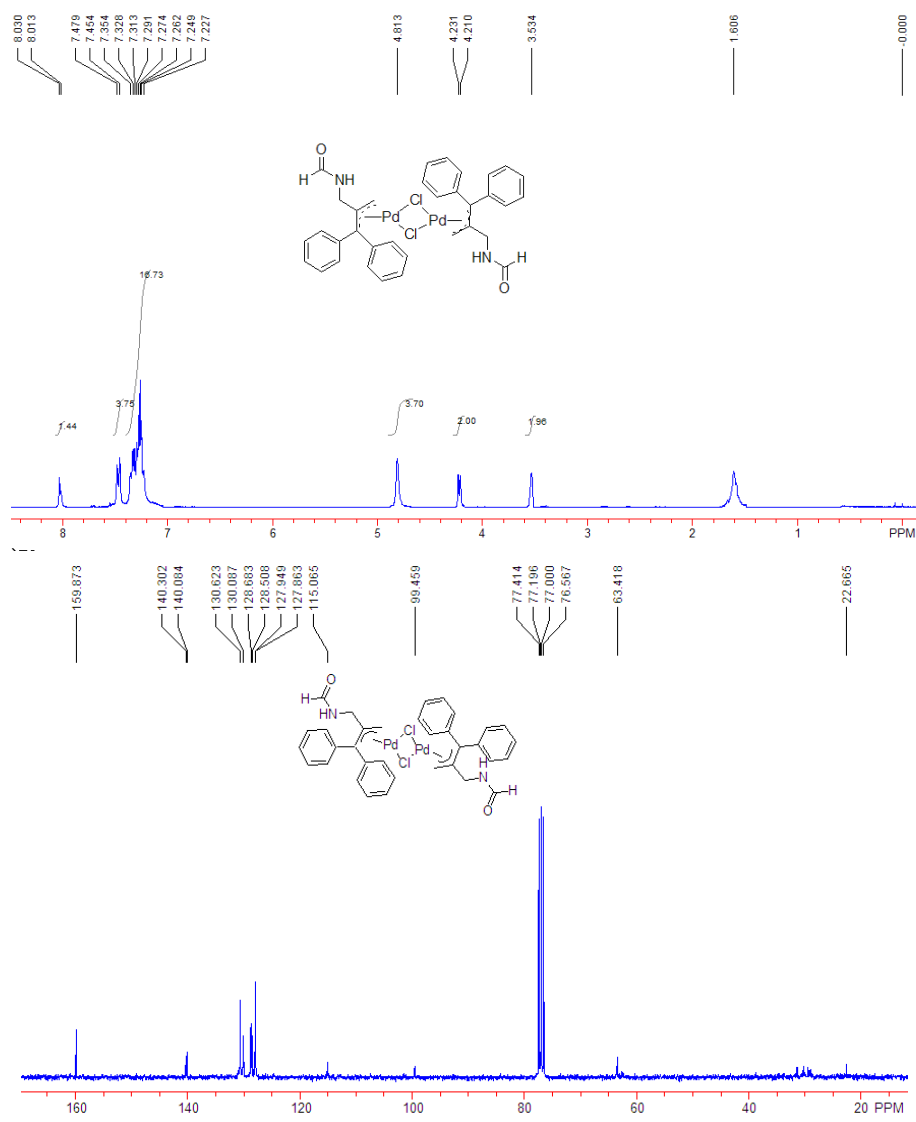

Product 6. A yellow solid. Mp: 169  $^\circ\text{C}$  (decomposed).  $^1\text{H}$  NMR ( $\text{CDCl}_3$ , 300 MHz, TMS)  $\delta$  3.47 (s, 2H), 4.18 (s, 4H), 4.28 (s, 2H), 7.14-7.22 (m, 12H, Ar), 7.28 (d, 4H,  $J = 6.9$  Hz, Ar), 7.41 (d, 4H,  $J = 6.6$  Hz, Ar), 7.94 (s, 2H).  $^{13}\text{C}$  NMR ( $\text{CDCl}_3$ , 75 MHz)  $\delta$  62.2, 97.9, 127.6, 127.9, 128.1, 128.6, 129.9, 130.3, 140.6, 140.7. IR ( $\text{CH}_2\text{Cl}_2$ ):  $\nu$  3446, 2924, 1705, 1490, 1443, 1362, 1220, 1077, 1015, 974, 763  $\text{cm}^{-1}$ . MS (ESI)  $m/z$ : 701 ( $\text{M}^+\text{Cl}$ ). HRMS (ESI) Calcd. For  $\text{C}_{32}\text{H}_{30}\text{O}_2\text{Cl}^{110}\text{Pd}_2$  ( $\text{M}^+\text{Cl}$ ) requires: 701.0037; Found: 701.0062.

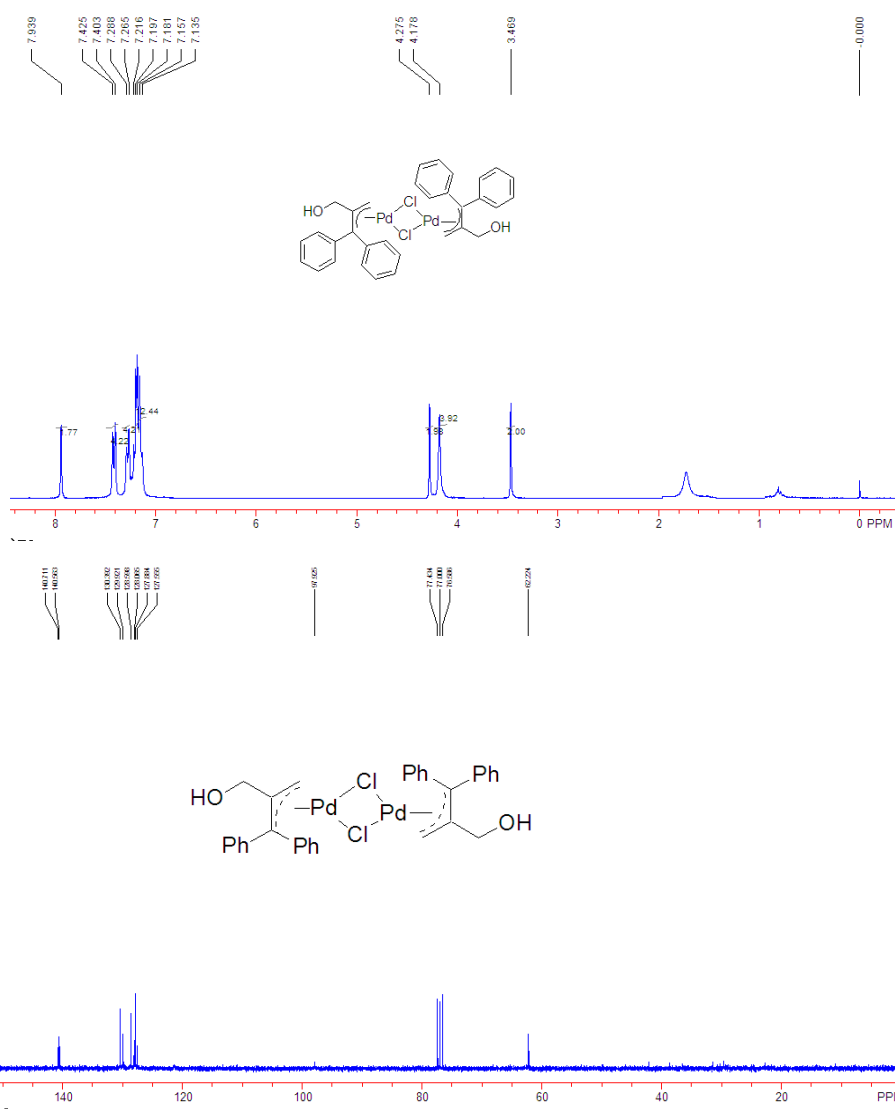

Product 7. A yellow solid. Mp: 230 °C (decomposed). <sup>1</sup>H NMR (CDCl<sub>3</sub>, 300 MHz, TMS) δ 0.93 (d, 6H, *J* = 3.9 Hz), 0.95 (d, 6H, *J* = 3.9 Hz), 1.21 (d, 6H, *J* = 6.6 Hz), 1.46 (d, 6H, *J* = 6.6 Hz), 2.23 (s, 1H), 2.27 (d, 1H, *J* = 10.5 Hz), 2.68-2.78 (m, 2H), 2.79 (s, 1H), 3.07-3.16 (m, 2H), 3.74 (d, 1H, *J* = 9.9 Hz), 6.92-7.13 (m, 10H, Ar), 7.19 (s, 2H), 7.31-7.46 (m, 6H, Ar). <sup>13</sup>C NMR (CDCl<sub>3</sub>, 75 MHz) δ 21.5, 22.9, 25.6, 27.0, 28.3, 28.7, 42.8, 48.5, 59.8, 106.7, 116.5, 123.6, 123.9, 124.1, 126.3, 126.8, 127.3, 128.2, 129.7, 130.2, 130.8, 135.8, 140.2, 140.9, 145.9, 146.0, 184.2. IR (CH<sub>2</sub>Cl<sub>2</sub>): ν 3056, 2964, 2928, 2868, 1596, 1464, 1444, 1404, 1333, 1264, 944, 801 cm<sup>-1</sup>. MS (ESI) *m/z*: 735 (M<sup>+</sup>). HRMS (ESI) Calcd. For C<sub>43</sub>H<sub>50</sub>N<sub>2</sub><sup>37</sup>Cl<sup>104</sup>Pd requires: 735.2673; Found: 735.2679.

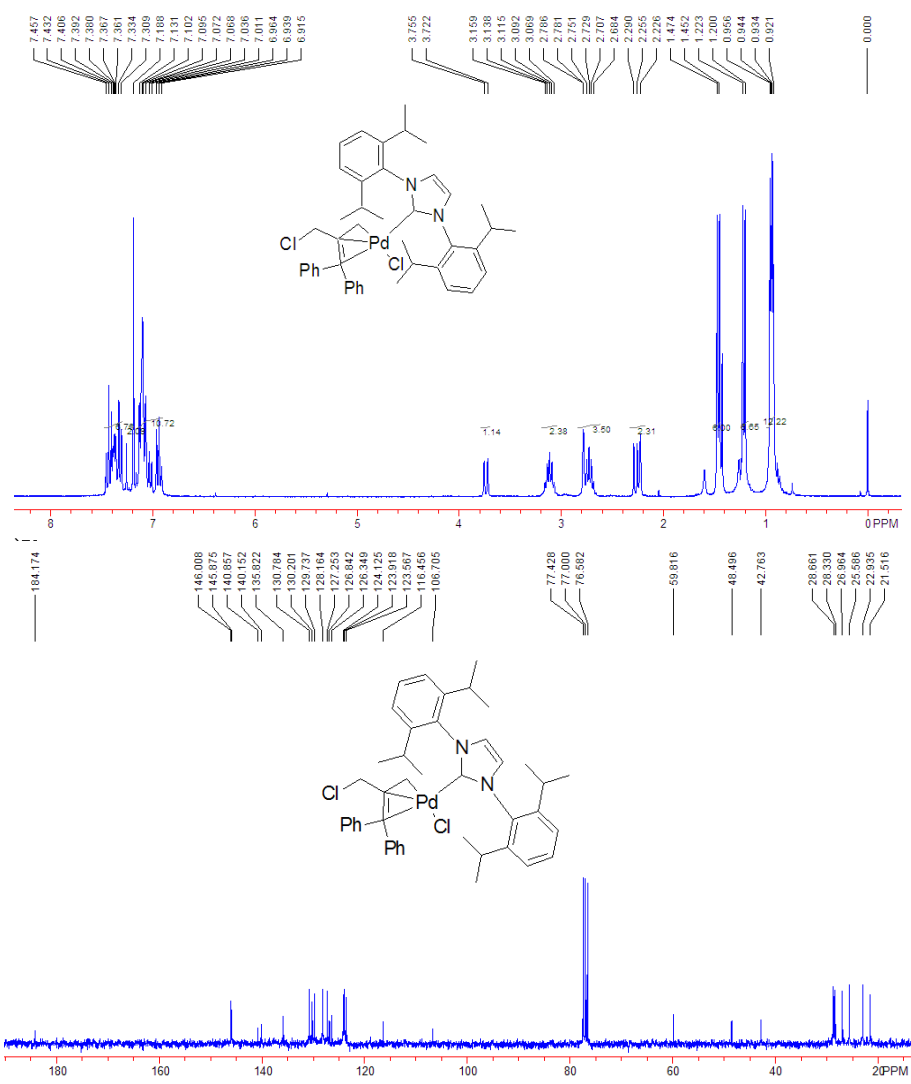

Product **9**. A yellow solid. Mp: 196 °C (decomposed).  $^1\text{H}$  NMR ( $\text{CDCl}_3$ , 400 MHz, TMS)  $\delta$  3.50 (s, 2H), 4.02 (d, 2H,  $J = 10.4$  Hz), 4.20 (s, 2H), 4.31 (d, 2H,  $J = 10.8$  Hz), 7.22-7.33 (m, 12H, Ar), 7.39 (d, 4H,  $J = 7.2$  Hz, Ar), 7.48 (d, 4H,  $J = 6.4$  Hz, Ar).  $^{13}\text{C}$  NMR ( $\text{CDCl}_3$ , 100 MHz)  $\delta$  43.0, 64.8, 64.9, 102.3, 115.4, 127.8, 127.9, 128.0, 128.6, 128.7, 130.6, 131.3, 139.9, 140.2. IR ( $\text{CH}_2\text{Cl}_2$ ):  $\nu$  3055, 2926, 1948, 1893, 1673, 1596, 1489, 1443, 1339, 1262, 1158, 1078, 1033, 1019, 923  $\text{cm}^{-1}$ . MS (ESI)  $m/z$ : 818 ( $\text{M}^+ - \text{Cl} + \text{H}$ ). HRMS (ESI) Calcd. For  $\text{C}_{32}\text{H}_{29}\text{Br}_2\text{ClPd}_2$  requires: 817.8394; Found: 817.9464.

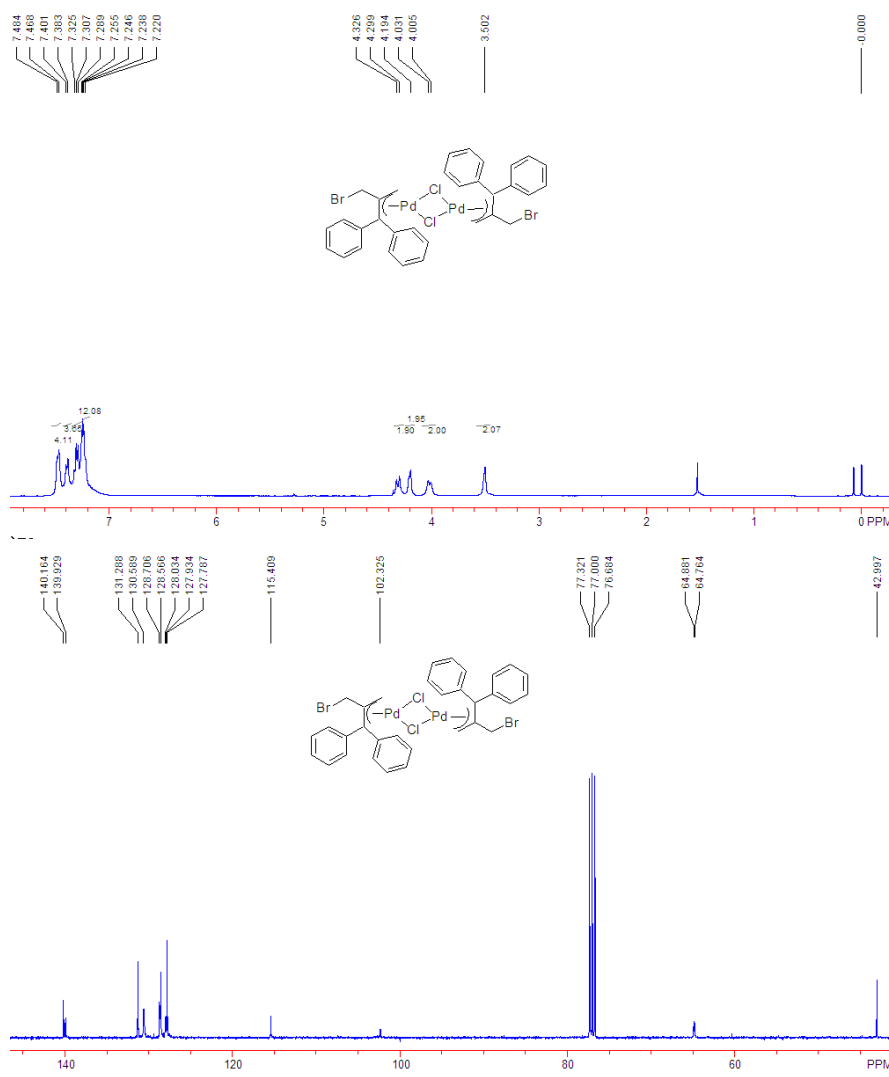

Product **12a**.<sup>1</sup> A white solid.  $^1\text{H}$  NMR ( $\text{CDCl}_3$ , 300 MHz, TMS)  $\delta$  2.36 (s, 3H), 7.21 (d, 2H,  $J$  = 7.8 Hz, Ar), 7.26-7.33 (m, 1H, Ar), 7.39 (t, 2H,  $J$  = 7.5 Hz, Ar), 7.47 (d, 2H,  $J$  = 7.8 Hz, Ar), 7.54-7.57 (m, 2H, Ar).

(1) Shi, M.; Qian, H.-X. *Tetrahedron* **2005**, *61*, 4949-4955.

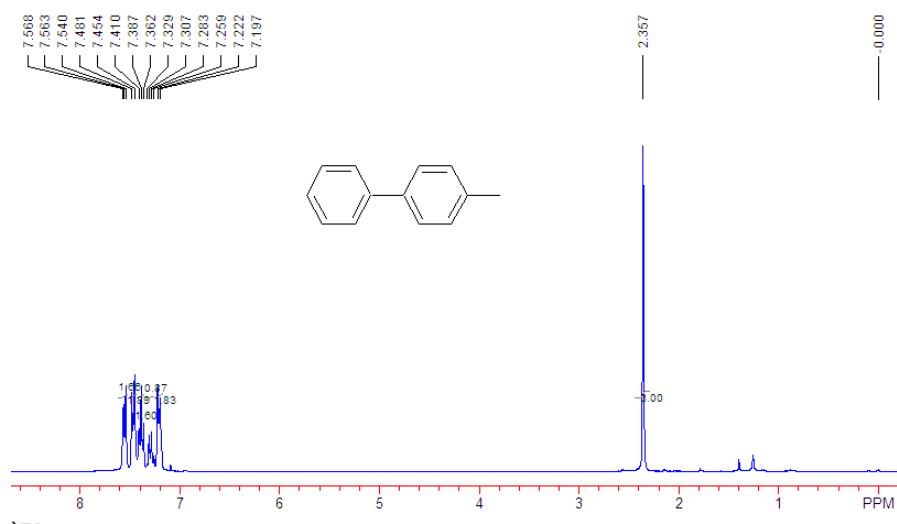

Product **12b**.<sup>1</sup> A white solid. <sup>1</sup>H NMR (CDCl<sub>3</sub>, 300 MHz, TMS) δ 2.34 (s, 6H), 6.96 (s, 1H, Ar), 7.19 (s, 2H, Ar), 7.25-7.31 (m, 1H, Ar), 7.35-7.40 (m, 2H, Ar), 7.53-7.56 (m, 2H, Ar).

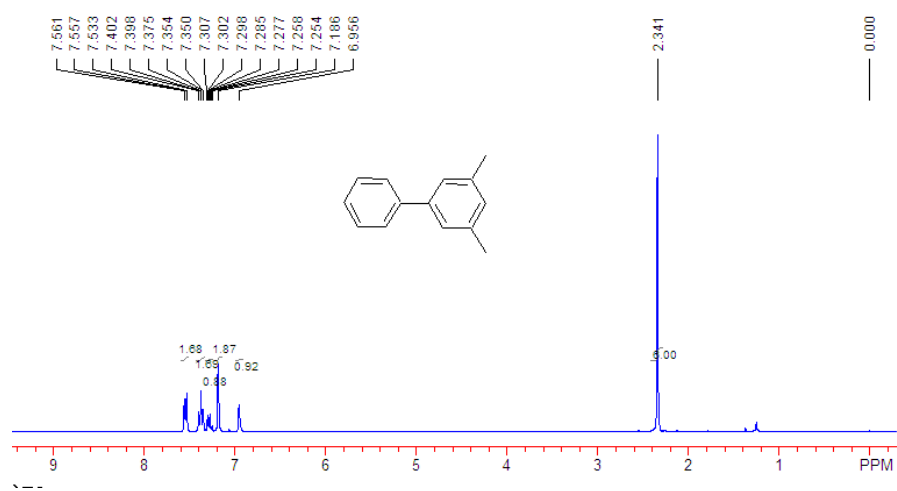

Product **12c**.<sup>2</sup> A white solid. <sup>1</sup>H NMR (CDCl<sub>3</sub>, 300 MHz, TMS) δ 2.35 (s, 9H), 6.95 (s, 1H, Ar), 7.19-7.22 (m, 4H, Ar), 7.46 (d, 2H, *J* = 8.1 Hz, Ar).

(2) Voegtle, F.; Steinhagen, G. *Chem. Ber.* **1978**, *111*, 205–212.

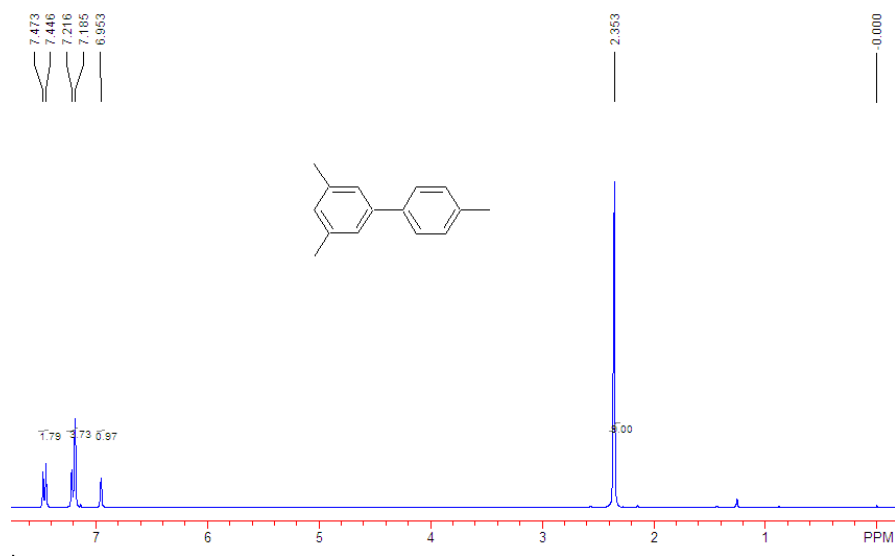

Product **12d**.<sup>1</sup> A white solid. <sup>1</sup>H NMR (CDCl<sub>3</sub>, 300 MHz, TMS) δ 2.27 (s, 3H), 7.22-7.45 (m, 8H, Ar), 7.58 (d, 1H, *J* = 7.8 Hz, Ar).

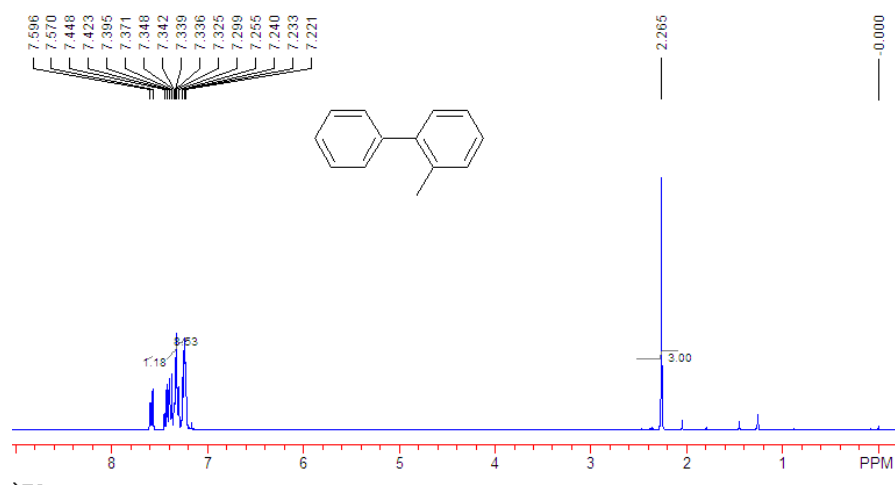

Product **12e**.<sup>3</sup> A white solid. <sup>1</sup>H NMR (CDCl<sub>3</sub>, 300 MHz, TMS) δ 2.26 (s, 3H), 2.34 (s, 6H), 6.93 (s, 2H, Ar), 6.97 (s, 1H, Ar), 7.20-7.23 (m, 4H, Ar).

(3) So, C.-M.; Lau, C. P.; Kwong, F. Y. *Angew. Chem., Int. Ed.* **2008**, *47*, 8059-8063.

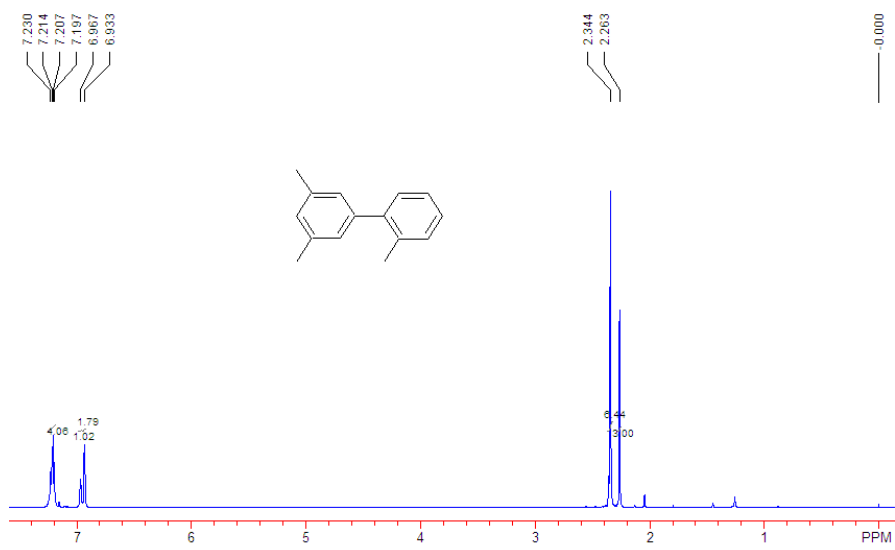

Product **12f**.<sup>4</sup> A white solid. <sup>1</sup>H NMR (CDCl<sub>3</sub>, 300 MHz, TMS) δ 2.34 (s, 6H), 6.97 (s, 1H, Ar), 7.13 (s, 2H, Ar), 7.33 (d, 2H, *J* = 8.4 Hz, Ar), 7.45 (d, 2H, *J* = 8.4 Hz, Ar).

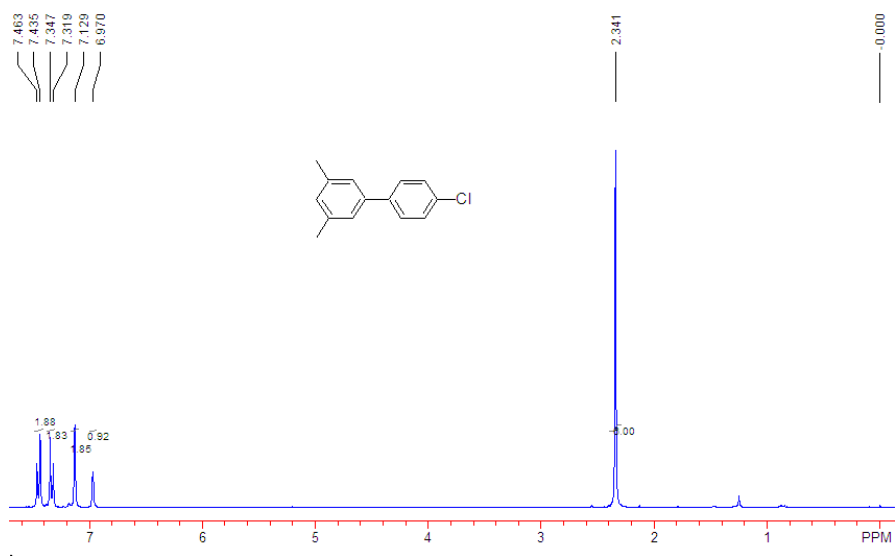

(4) Gregory, N. L. *J. Chem. Soc. B* **1968**, 295-299.
